# Supplementary material
Source: publisher figshare collection journal article supplement (https://sage.figshare.com/ndownloader/files/17905238)
Supplement: Supplementary file 1 [file 17905238]

**Supplemental Digital Appendix 1. Keywords describing NI V projects as submitted by each team.**

| Specific Population Focused Efforts         | Health Delivery Curriculum, Educational, or Program Development | Community Oriented Domains              |
|---------------------------------------------|-----------------------------------------------------------------|-----------------------------------------|
| Adults                                      | Cultural competency                                             | Accessing population health information |
| Alcohol                                     | Disparities/biases                                              | Food insecurities and nutrition         |
| Children with high acuity needs/Asthma      | Engaging medical students                                       | Free clinics                            |
| Diabetes                                    | Engaging residents/programs                                     | Health e-registry                       |
| Families                                    | Equitable health                                                | Institutional roadmap                   |
| Hispanic                                    | Health advocacy                                                 | Leaders                                 |
| Immigrants and refugees                     | Health equity residency track                                   | Partnership                             |
| Incarcerated people                         | Interpreters                                                    | Primary care                            |
| Inpatient                                   | Medication assistance                                           | Resources                               |
| Intellectual and developmental disabilities | Patient Navigation                                              | Zip code                                |
| LGBT                                        | Promoting healthy behaviors                                     |                                         |
| Mortality rates                             | Research                                                        |                                         |
| Obesity                                     | Residency clinics                                               |                                         |
| Outpatient                                  | Social media app                                                |                                         |
| Smoking                                     |                                                                 |                                         |
| Uninsured                                   |                                                                 |                                         |
| Vietnamese                                  |                                                                 |                                         |
| Victims of sexual assault                   |                                                                 |                                         |
